# Supplementary material for: Tuning the Sensing Properties of N and S Co-Doped Carbon Dots for Colorimetric Detection of Copper and Cobalt in Water
Source: MDPI journal article supplement (doi:10.3390/s22072487), 2022-03-24
Supplement: s1 [file s1]

Supplementary Material

# Tuning the Sensing Properties of N and S Co-Doped Carbon Dots for Colorimetric Detection of Copper and Cobalt in Water

Ramanand Bisauriya <sup>1</sup>, Simonetta Antonaroli <sup>2</sup>, Matteo Ardini <sup>3</sup>, Francesco Angelucci <sup>3</sup>, Antonella Ricci <sup>4</sup> and Roberto Pizzoferrato <sup>1,\*</sup>

<sup>1</sup> Department of Industrial Engineering, University of Rome Tor Vergata, 00133 Rome, Italy; ramanand.bisauriya@students.uniroma2.eu

<sup>2</sup> Department of Chemical Sciences and Technology, University of Rome Tor Vergata, 00133 Rome, Italy; simonetta.antonaroli@uniroma2.it

<sup>3</sup> Department of Life, Health and Environmental Sciences, University of L'Aquila, 67100 L'Aquila, Italy; matteo.ardini@univaq.it (M.A.); francesco.angelucci@univaq.it (F.A.)

<sup>4</sup> Faculty of Bioscience and Technologies for Food, Agriculture and Environment, University of Teramo, 64100 Teramo, Italy; aricci@unite.it

\* Correspondence: pizzoferrato@uniroma2.it

**Citation:** Bisauriya, R.; Antonaroli, S.; Ardini, M.; Angelucci, F.; Ricci, A.; Pizzoferrato, R. Tuning the Sensing Properties of N and S Co-Doped Carbon Dots for Colorimetric Detection of Copper and Cobalt in Water. *Sensors* **2022**, *22*, 2487. <https://doi.org/10.3390/s22072487>

Academic Editor: Cecilia Cristea

Received: 2 March 2022

Accepted: 22 March 2022

Published: 24 March 2022

**Publisher's Note:** MDPI stays neutral with regard to jurisdictional claims in published maps and institutional affiliations.

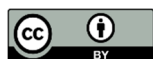

**Copyright:** © 2022 by the authors. Licensee MDPI, Basel, Switzerland. This article is an open access article distributed under the terms and conditions of the Creative Commons Attribution (CC BY) license (<https://creativecommons.org/licenses/by/4.0/>).

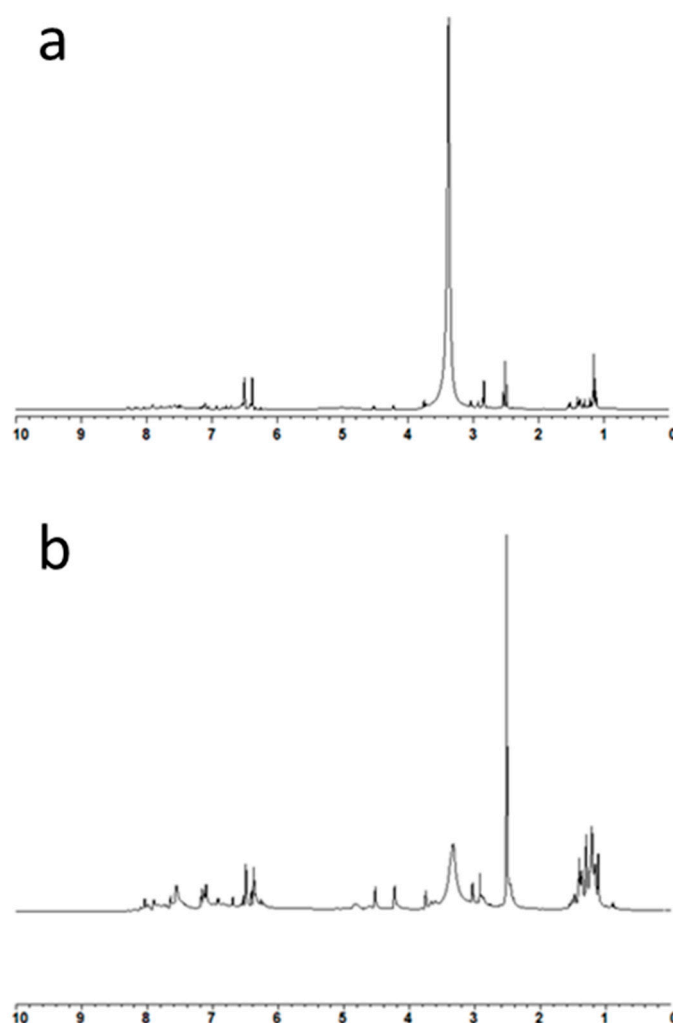

**Figure S1.** Comparison of the <sup>1</sup>H NMR spectra of (a) NS-CDs and (b) NS-CDs + Cu(II).

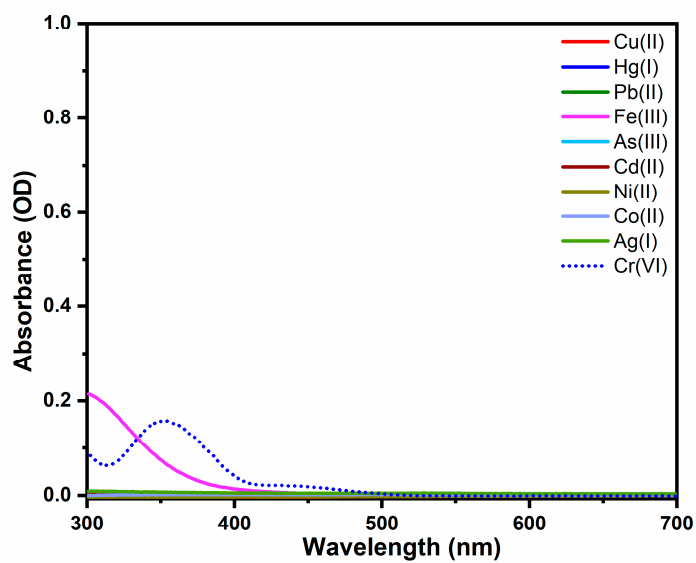

**Figure S2.** UV-vis absorption spectra of water solutions of HM ions at a concentration of 100 μM.

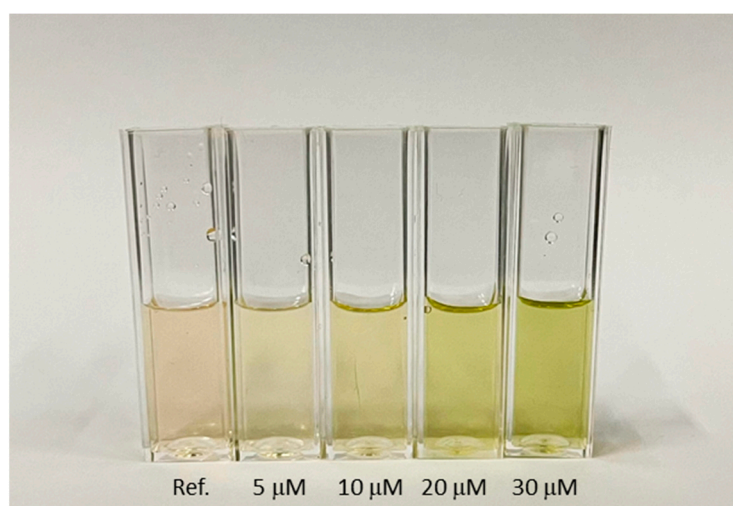

**Figure S3.** Color variations of the as-prepared NS-CDs sensing solution upon the addition of Cu(II) ions in the low range of concentrations.

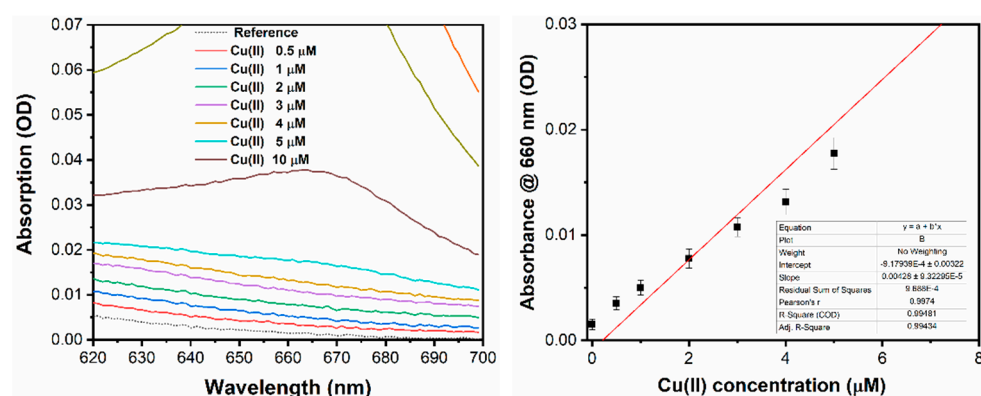

**Figure S4.** UV-vis absorption spectra (left) and calibration curve (right) of the as-prepared NS-CDs sensing solution upon the addition of Cu(II) ions in the low range of concentrations. The red line in the calibration curve represents the linear fit with the high-concentration data.

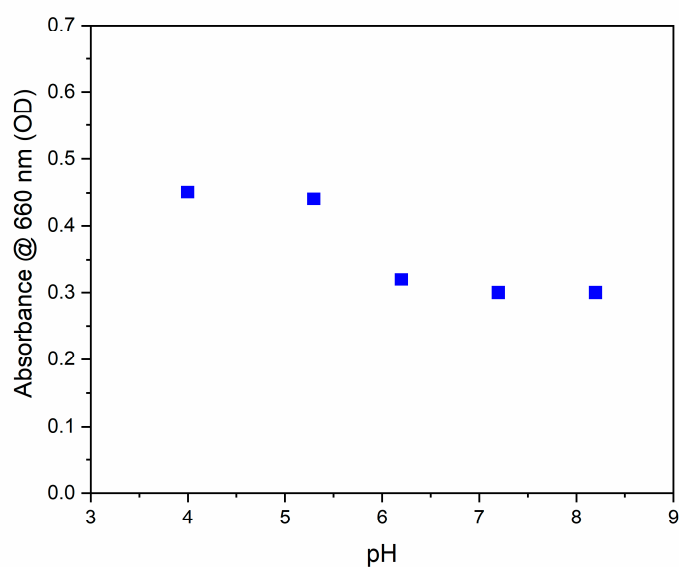

**Figure S5.** Dependence of absorbance at 660 nm of as-prepared NS-CDs sensing solution on the pH of the DI water samples with 100  $\mu\text{M}$  of Cu(II).

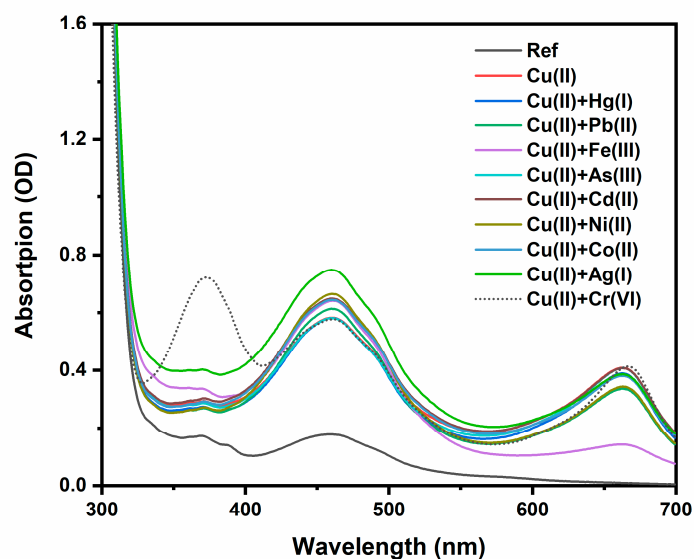

**Figure S6.** UV-vis absorption spectra of as-prepared NS-CDs sensing solution upon the addition of Cu(II) and other interfering HM ions at a concentration of 100  $\mu$ M.

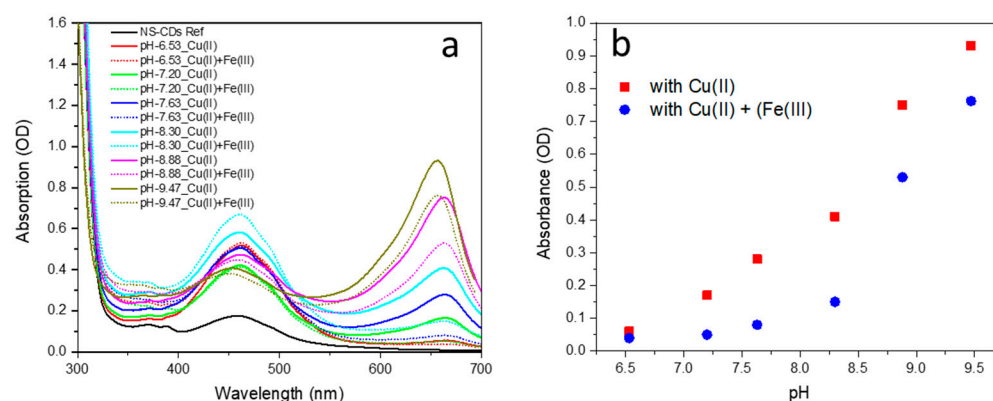

**Figure S7.** (a) UV-vis absorption spectra of NS-CDs sensing solution upon the addition of Cu(II) and Fe(III) at a concentration of 100 mM for different values of pH of sensing solution; (b) Absorbance at 660 nm with Cu(II) in the presence of Fe(III) (blue circles) and in absence (red squares) for different values of pH of sensing solution.

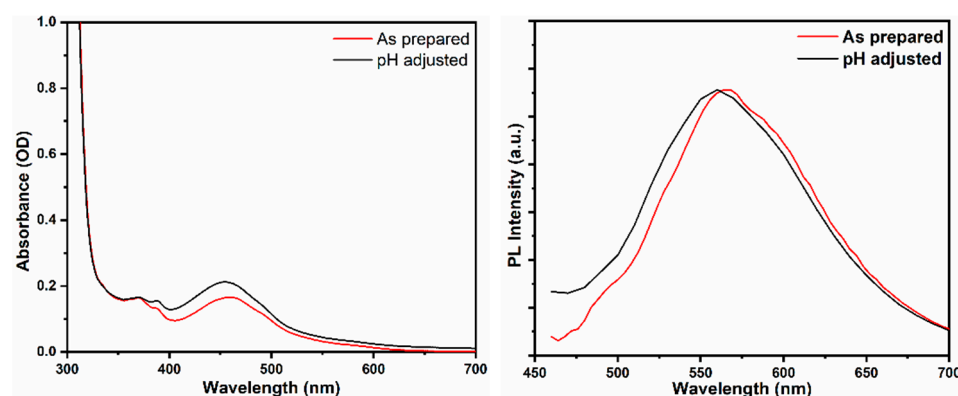

**Figure S8.** Comparison of UV-vis absorption spectra (left) and fluorescence spectra (right) of as-prepared NS-CDs sensing solution (red curves) and pH-adjusted sensing solution (black).

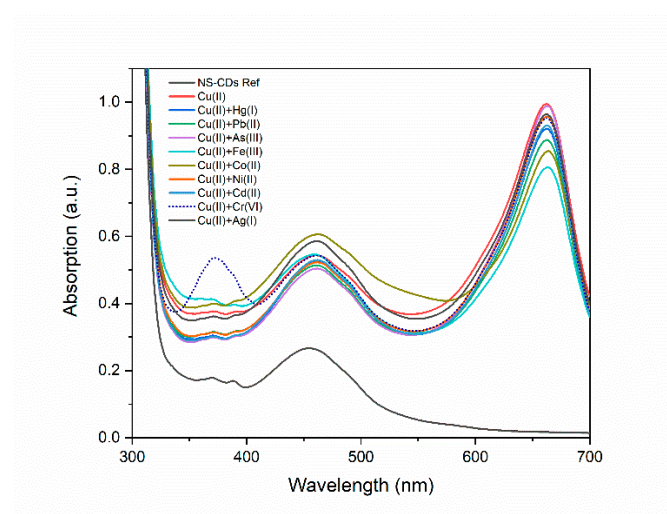

**Figure S9.** UV-vis absorption spectra of pH-optimized NS-CD sensing solution upon the addition of Cu(II) and other interfering HM ions at a concentration of 100  $\mu$ M.

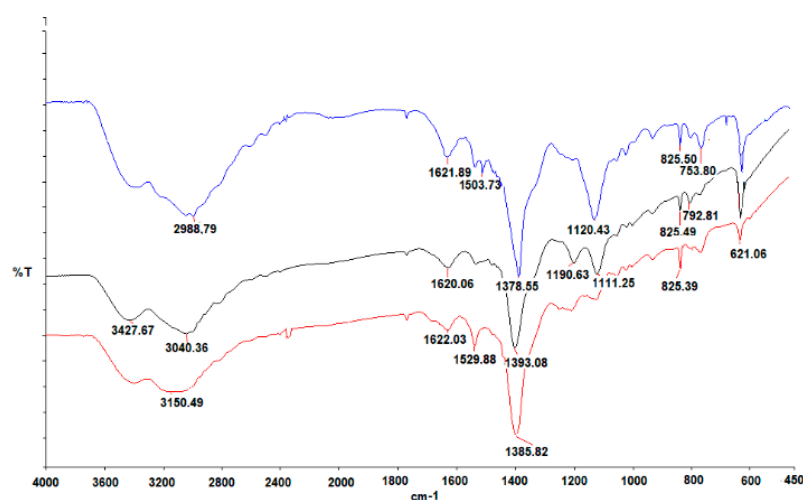

**Figure S10.** FTIR spectra of the dried samples: pH-optimized NS-CDs sensing solution (blue curve), NS-CDs + Cu(II) (black) and NS-CDs + Fe(III) (red).

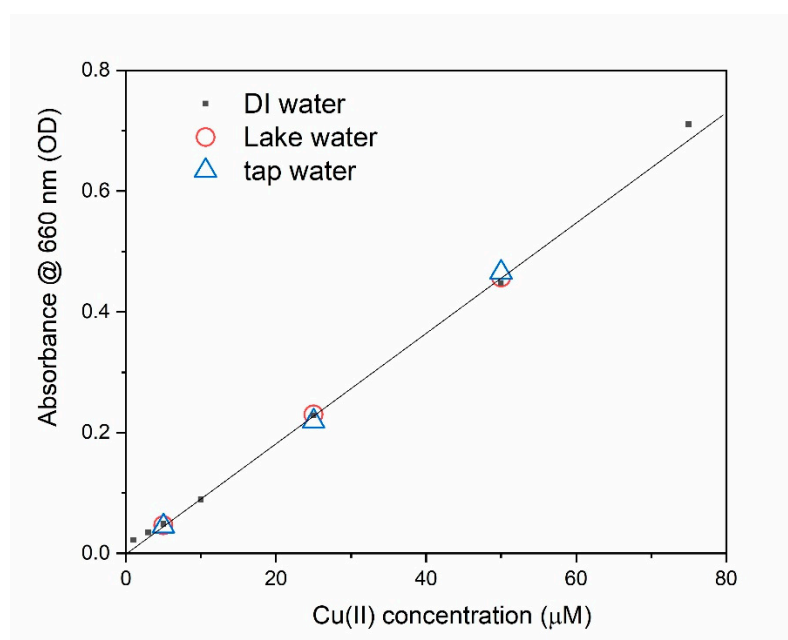

**Figure S11.** Measurements in real water samples in comparison with the calibration curve obtained in DI water.
